# Supplementary material for: Proteomic Analysis of Intracellular and Membrane-Associated Fractions of Canine (Canis lupus familiaris) Epididymal Spermatozoa and Sperm Structure Separation
Source: MDPI journal article supplement (doi:10.3390/ani12060772), 2022-03-18
Supplement: s1 [file s1]

**Table S2.** Proteins present in epididymal sperm membrane-associated fraction (SMAPs) of dog (*Canis lupus familiaris*), evaluated by SDS PAGE and mass spectrometry (NanoUPLC-Q-TOF/MS). Proteins were identified by UniProt (Swiss-Prot accession number) and NCBI (NCBI accession number). DAPs—differentially abundant proteins in SMAP fraction. Range 1–8 means protein fraction range on SDS PAGE gel.

| Range | DAPs | Protein Name                                                     | Swiss-Prot Accession Number | Gene Symbol   | Sequence Coverage (%) | Molecular Weight (kDa) | Peptide Counts (Unique) | Peptide Counts (All) | Protein Score |
|-------|------|------------------------------------------------------------------|-----------------------------|---------------|-----------------------|------------------------|-------------------------|----------------------|---------------|
| 1     |      | NPC intracellular cholesterol transporter 2                      | Q28895                      | <i>NPC2</i>   | 15.4                  | 16.1                   | 1                       | 4                    | 229           |
|       |      | Arginine esterase                                                | P09582                      | <i>N/A</i>    | 5.4                   | 28.7                   | 1                       | 2                    | 200           |
|       |      | Lactotransferrin                                                 | A0A5F4BVF3                  | <i>LTF</i>    | 6.7                   | 68.8                   | 2                       | 5                    | 170           |
|       |      | F-actin monooxygenase                                            | A0A5F4D7I6                  | <i>MICAL1</i> | 0.7                   | 111.2                  | 1                       | 4                    | 163           |
|       |      | A-kinase anchoring protein 13                                    | F1Q074                      | <i>AKAP13</i> | 0.3                   | 301.7                  | 1                       | 1                    | 143           |
|       |      | Phosphatidylinositol 4-kinase alpha                              | F1PMC5                      | <i>PI4KA</i>  | 1.1                   | 236.4                  | 1                       | 1                    | 96            |
|       |      | ATP binding cassette subfamily C member 4                        | A0A5F4CYQ3                  | <i>ABCC4</i>  | 1.9                   | 146.1                  | 1                       | 1                    | 85            |
|       |      | Transient receptor potential cation channel subfamily C member 5 | F1PA53                      | <i>TRPC5</i>  | 2.3                   | 111.4                  | 1                       | 1                    | 81            |
|       |      | GTP binding protein 2                                            | E2RC60                      | <i>GTPBP2</i> | 1.3                   | 65.7                   | 1                       | 1                    | 79            |
| 2     |      | Epididymal secretory protein E1                                  | F1PAR9                      | <i>NPC2</i>   | 32.3                  | 20.2                   | 3                       | 27                   | 564           |
|       |      | NPC intracellular cholesterol transporter 2                      | Q28895                      | <i>NPC2</i>   | 21.5                  | 16.1                   | 2                       | 23                   | 552           |
|       |      | Alpha fetoprotein                                                | F2Z4Q6                      | <i>AFP</i>    | 38.6                  | 72.0                   | 18                      | 72                   | 462           |
|       |      | Lactotransferrin                                                 | F1PR54                      | <i>LTF</i>    | 15.4                  | 77.3                   | 9                       | 25                   | 453           |
|       |      | Lipochn_cytosolic_FA-bd_dom domain-containing protein            | E2R6E0                      | <i>LCNL1</i>  | 3.4                   | 32.6                   | 1                       | 5                    | 405           |
|       |      | Boule homolog, RNA binding protein                               | A0A5F4C9S3                  | <i>BOLL</i>   | 1.9                   | 39.7                   | 1                       | 4                    | 179           |
|       |      | Olfactory receptor                                               | F1PCR4                      | <i>OR2AE1</i> | 3.8                   | 36.1                   | 1                       | 1                    | 161           |
|       |      | Cysteine rich secretory protein 2                                | A0A5F4D6X1                  | <i>CRISP2</i> | 8.4                   | 36.1                   | 1                       | 2                    | 143           |
|       |      | Terminal uridylyl transferase 7                                  | A0A5F4D1U6                  | <i>TUT7</i>   | 1.3                   | 169.8                  | 1                       | 1                    | 135           |
|       |      | Glutamine--fructose-6-phosphate transaminase (isomerizing)       | J9P432                      | <i>GFPT1</i>  | 1.2                   | 76.1                   | 1                       | 1                    | 134           |
|       |      | Importin subunit alpha                                           | F1PV58                      | <i>KPNA3</i>  | 4.6                   | 55.1                   | 1                       | 1                    | 125           |
|       |      | Olfactory receptor-like protein DTMT                             | P30955                      | <i>N/A</i>    | 13.4                  | 35.2                   | 1                       | 2                    | 124           |
|       |      | Ig-like domain-containing protein                                | J9NSQ1                      | <i>N/A</i>    | 15.8                  | 12.9                   | 1                       | 2                    | 119           |

|   |   |                                                                          |            |                  |      |       |    |    |     |
|---|---|--------------------------------------------------------------------------|------------|------------------|------|-------|----|----|-----|
|   |   | Inositol 1,4,5-trisphosphate receptor type 2                             | A0A5F4CFY8 | <i>ITPR2</i>     | 0.9  | 278.8 | 1  | 1  | 117 |
|   |   | Peptidylglycine alpha-amidating monooxygenase                            | F6X870     | <i>PAM</i>       | 3.0  | 91.6  | 1  | 2  | 108 |
|   |   | GLI family zinc finger 1                                                 | A0A5F4D967 | <i>GLI1</i>      | 0.7  | 121.0 | 1  | 5  | 107 |
|   |   | Olfactory receptor family 6 subfamily C member 3I                        | A0A5F4CFE1 | <i>OR6C3I</i>    | 8.0  | 35.5  | 1  | 1  | 100 |
|   |   | Potassium voltage-gated channel subfamily Q member 4                     | F1Q3A1     | <i>KCNQ4</i>     | 3.0  | 79.2  | 1  | 1  | 96  |
|   |   | Septin-type G domain-containing protein                                  | A0A5F4C9N8 | <i>SEPTIN9</i>   | 1.4  | 65.5  | 1  | 3  | 91  |
|   |   | Toll like receptor 4                                                     | F1PDB9     | <i>TLR4</i>      | 1.0  | 96.0  | 1  | 9  | 89  |
|   |   | Astrotactin 1                                                            | A0A5F4D0C2 | <i>ASTN1</i>     | 2.1  | 140.9 | 1  | 2  | 86  |
|   |   | Codanin 1                                                                | F1PXQ3     | <i>CDAN1</i>     | 1.9  | 131.3 | 1  | 2  | 84  |
|   |   | Malignant T-cell-amplified sequence                                      | J9P226     | <i>LOC487150</i> | 11.0 | 20.6  | 1  | 1  | 84  |
|   |   | GIT ArfGAP 1                                                             | A0A5F4DJN3 | <i>GIT1</i>      | 3.3  | 84.4  | 1  | 1  | 80  |
|   |   | Netrin receptor UNC5                                                     | E2RC29     | <i>UNC5B</i>     | 4.9  | 103.1 | 2  | 2  | 75  |
|   |   | Olfactory receptor                                                       | F1PE91     | <i>OR6C69G</i>   | 8.4  | 34.9  | 1  | 1  | 74  |
| 3 | f | Epididymal secretory protein E1                                          | F1PAR9     | <i>NPC2</i>      | 33.3 | 20.2  | 4  | 29 | 470 |
|   | f | Lactotransferrin                                                         | F1PR54     | <i>LTF</i>       | 17.4 | 77.3  | 12 | 22 | 335 |
|   | g | WAP domain-containing protein                                            | E2RCT1     | <i>N/A</i>       | 14.7 | 13.0  | 1  | 3  | 303 |
|   | g | Cysteine rich secretory protein 2                                        | A0A5F4CCD0 | <i>CRISP2</i>    | 13.5 | 35.4  | 2  | 5  | 302 |
|   |   | A-kinase anchoring protein 13                                            | F1Q074     | <i>AKAP13</i>    | 0.3  | 301.7 | 1  | 2  | 183 |
|   |   | Pyruvate kinase                                                          | A0A5F4CGU2 | <i>PKLR</i>      | 6.8  | 60.2  | 1  | 3  | 175 |
|   |   | Phospholipase A2 receptor 1                                              | A0A5F4D8I6 | <i>PLA2R1</i>    | 0.5  | 160.5 | 1  | 3  | 162 |
|   |   | Nik related kinase                                                       | F1PB88     | <i>NRK</i>       | 0.5  | 171.5 | 1  | 1  | 136 |
|   |   | Transmembrane protein 115                                                | E2QWQ9     | <i>TMEM115</i>   | 11.1 | 38.2  | 1  | 1  | 133 |
|   |   | Alpha-1,3-mannosyl-glycoprotein 4-beta-N-acetylglucosaminyltransferase B | A0A5F4CBI5 | <i>MGAT4B</i>    | 4.3  | 63.9  | 1  | 1  | 127 |
|   |   | Phosphatidylinositol glycan anchor biosynthesis class S                  | F6X735     | <i>PIGS</i>      | 5.2  | 61.5  | 1  | 2  | 122 |
|   |   | LDL receptor related protein 2                                           | F1PIB4     | <i>LRP2</i>      | 0.6  | 520.6 | 2  | 2  | 120 |

|   |   |                                              |            |                |      |       |   |    |     |
|---|---|----------------------------------------------|------------|----------------|------|-------|---|----|-----|
|   |   | Codanin 1                                    | F1PXQ3     | <i>CDAN1</i>   | 1.9  | 131.3 | 1 | 3  | 118 |
|   |   | GRB2 associated regulator of MAPK1 subtype 1 | A0A5F4DGU3 | <i>GAREM1</i>  | 1.1  | 87.4  | 1 | 1  | 106 |
|   |   | Docking protein 1                            | A0A5F4BR19 | <i>DOK1</i>    | 21.1 | 19.2  | 1 | 1  | 104 |
|   |   | Protein inhibitor of activated STAT 3        | F1Q1E9     | <i>PIAS3</i>   | 6.8  | 64.6  | 1 | 1  | 100 |
|   |   | Phospholipid-transporting ATPase             | J9P2W7     | <i>ATP8A1</i>  | 1.9  | 132.9 | 1 | 2  | 94  |
|   |   | ElaC homolog protein 2                       | A0A5F4CLL9 | <i>ELAC2</i>   | 1.1  | 91.3  | 1 | 1  | 94  |
|   |   | EFR3 homolog B                               | F1PMW4     | <i>EFR3B</i>   | 0.9  | 103.0 | 1 | 1  | 94  |
|   |   | Family with sequence similarity 181 member B | J9NZN3     | <i>FAM181B</i> | 8.4  | 40.8  | 2 | 2  | 92  |
|   |   | Diacylglycerol kinase                        | A0A5F4C8J4 | <i>DGKH</i>    | 1.9  | 134.6 | 1 | 1  | 84  |
|   |   | Zona pellucida sperm-binding protein 3       | P48831     | <i>ZP3</i>     | 2.1  | 47.4  | 1 | 1  | 79  |
|   |   | VPS37 C-terminal domain-containing protein   | E2QZC7     | <i>VPS37B</i>  | 10.1 | 31.4  | 1 | 1  | 78  |
|   |   | Olfactory receptor                           | E2R1U1     | <i>OR9G10</i>  | 14.5 | 34.8  | 1 | 2  | 78  |
|   |   | CCCTC-binding factor like                    | E2RLE7     | <i>CTCFL</i>   | 2.0  | 35.4  | 1 | 27 | 75  |
|   |   | YEATS domain containing 4                    | E2QSI2     | <i>YEATS4</i>  | 2.6  | 26.5  | 1 | 1  | 71  |
| 4 | h | Lactotransferrin                             | A0A5F4BVF3 | <i>LTF</i>     | 11.3 | 68.8  | 6 | 26 | 382 |
|   |   | Actin, cytoplasmic 1                         | O18840     | <i>ACTB</i>    | 5.3  | 41.7  | 4 | 41 | 378 |
|   |   | NPC intracellular cholesterol transporter 2  | Q28895     | <i>NPC2</i>    | 30.2 | 16.1  | 3 | 9  | 301 |
|   | h | von Willebrand factor A domain containing 5A | A0A5F4CPY7 | <i>VWA5A</i>   | 0.8  | 89.2  | 1 | 4  | 277 |
|   |   | Ubiquitin-60S ribosomal protein L40          | P63050     | <i>UBA52</i>   | 7.0  | 14.7  | 1 | 4  | 262 |
|   |   | Albumin                                      | P49822     | <i>ALB</i>     | 8.9  | 68.6  | 5 | 14 | 258 |
|   |   | Epididymal secretory protein E1              | F1PAR9     | <i>NPC2</i>    | 27.5 | 20.2  | 3 | 8  | 255 |
|   |   | Cysteine rich secretory protein 2            | A0A5F4CCD0 | <i>CRISP2</i>  | 8.4  | 35.4  | 2 | 2  | 238 |
|   |   | Lactotransferrin                             | F1PR54     | <i>LTF</i>     | 14.4 | 77.3  | 9 | 21 | 229 |
|   |   | Prostaglandin-H2 D-isomerase                 | Q9XS65     | <i>PTGDS</i>   | 7.3  | 21.1  | 1 | 2  | 221 |
|   |   | WAP domain-containing protein                | E2RCT1     | <i>N/A</i>     | 9.5  | 13.0  | 2 | 5  | 206 |
|   |   | A-kinase anchoring protein 13                | F1Q074     | <i>AKAP13</i>  | 0.3  | 301.7 | 1 | 4  | 194 |
|   |   | Pleckstrin homology domain containing A4     | A0A5F4BQH3 | <i>PLEKHA4</i> | 0.9  | 85.1  | 1 | 1  | 180 |
|   |   | Senataxin                                    | A0A5F4CUE8 | <i>SETX</i>    | 0.4  | 300.1 | 1 | 3  | 176 |
|   |   | Solute carrier family 4 member 9             | J9P3D0     | <i>SLC4A9</i>  | 1.1  | 98.1  | 1 | 3  | 174 |

|                                                                 |            |                |     |       |   |    |     |
|-----------------------------------------------------------------|------------|----------------|-----|-------|---|----|-----|
| 1-phosphatidylinositol 4,5-bisphosphate phosphodiesterase gamma | F1PS03     | <i>PLCG1</i>   | 1.2 | 140.4 | 1 | 1  | 171 |
| Cyclic nucleotide binding domain containing 1                   | F1Q3I2     | <i>CNBD1</i>   | 1.0 | 58.5  | 1 | 1  | 165 |
| Pyruvate dehydrogenase E1 component subunit beta                | J9P208     | <i>N/A</i>     | 3.0 | 36.3  | 1 | 1  | 153 |
| Acrosin                                                         | A0A5F4C1D8 | <i>ACR</i>     | 2.1 | 46.0  | 1 | 1  | 152 |
| Epididymal secretory glutathione peroxidase                     | O46607     | <i>GPX5</i>    | 2.7 | 25.3  | 1 | 2  | 153 |
| Metaxin                                                         | F1PSR1     | <i>MTX3</i>    | 9.0 | 32.2  | 1 | 1  | 147 |
| Olfactory receptor                                              | E2R8V1     | <i>OR4G18</i>  | 1.9 | 35.5  | 1 | 1  | 144 |
| RNA polymerase II subunit C                                     | E2RQ42     | <i>POLR2C</i>  | 2.5 | 32.1  | 1 | 1  | 142 |
| Reverse transcriptase domain-containing protein                 | A0A5F4DC84 | <i>N/A</i>     | 1.1 | 78.7  | 1 | 1  | 130 |
| CE10 protein                                                    | Q9XSV4     | <i>ce10</i>    | 9.1 | 12.8  | 1 | 5  | 129 |
| Proline-serine-threonine phosphatase interacting protein 1      | A0A5F4C854 | <i>PSTPIP1</i> | 3.6 | 15.9  | 1 | 1  | 123 |
| Component of oligomeric Golgi complex 7                         | A0A5F4D723 | <i>COG7</i>    | 1.4 | 83.2  | 1 | 1  | 122 |
| Cullin 7                                                        | J9NWA1     | <i>CUL7</i>    | 0.6 | 176.9 | 1 | 1  | 114 |
| TEPSIN adaptor related protein complex 4 accessory protein      | A0A5F4D252 | <i>TEPSIN</i>  | 1.3 | 61.4  | 1 | 1  | 106 |
| Ezrin                                                           | E2RSI6     | <i>EZR</i>     | 1.5 | 69.4  | 1 | 1  | 92  |
| Integrin subunit alpha V                                        | A0A5F4C9R4 | <i>ITGAV</i>   | 1.5 | 114.4 | 1 | 1  | 91  |
| FYVE, RhoGEF and PH domain containing 6                         | A0A5F4CU74 | <i>FGD6</i>    | 1.4 | 148.3 | 1 | 3  | 86  |
| Tubulin tyrosine ligase like 5                                  | A0A5F4CSA7 | <i>TTLL5</i>   | 0.9 | 142.9 | 1 | 1  | 79  |
| Tudor domain containing 9                                       | J9P8U1     | <i>TDRD9</i>   | 1.3 | 151.1 | 1 | 2  | 76  |
| TAO kinase 3                                                    | A0A5F4CM71 | <i>TAOK3</i>   | 1.4 | 95.4  | 1 | 1  | 71  |
| Transmembrane protein 117                                       | J9P2K4     | <i>TMEM117</i> | 2.6 | 59.6  | 1 | 1  | 71  |
| Solute carrier family 15 member 1                               | Q8WMX5     | <i>SLC15A1</i> | 0.3 | 78.7  | 1 | 2  | 70  |
| Cysteine rich secretory protein 2                               | A0A5F4D6X1 | <i>CRISP2</i>  | 8.4 | 36.1  | 1 | 5  | 361 |
| Lactotransferrin                                                | F1PR54     | <i>LTF</i>     | 5.4 | 77.3  | 3 | 10 | 252 |

|   |                                                       |            |                  |      |        |    |    |     |
|---|-------------------------------------------------------|------------|------------------|------|--------|----|----|-----|
|   | Lipocln_cytosolic_FA-bd_dom domain-containing protein | E2R6E0     | <i>LCNL1</i>     | 3.7  | 32.6   | 1  | 1  | 217 |
|   | Albumin                                               | P49822     | <i>ALB</i>       | 12.5 | 68.6   | 5  | 6  | 205 |
|   | Acrosin                                               | A0A5F4C1D8 | <i>ACR</i>       | 5.9  | 46.0   | 1  | 1  | 198 |
|   | ATP synthase subunit beta                             | A0A5F4DJV1 | <i>ATP5F1B</i>   | 2.4  | 68.0   | 1  | 1  | 196 |
|   | Glucose-6-phosphate isomerase                         | E2R2C3     | <i>GPI</i>       | 3.2  | 63.0   | 1  | 6  | 184 |
|   | Epididymal secretory glutathione peroxidase           | O46607     | <i>GPX5</i>      | 15.8 | 25.3   | 2  | 3  | 179 |
|   | Carboxylesterase 5A                                   | Q6AW47     | <i>CES5A</i>     | 3.7  | 63.6   | 1  | 3  | 168 |
|   | A-kinase anchoring protein 13                         | F1Q074     | <i>AKAP13</i>    | 0.3  | 301.7  | 1  | 2  | 151 |
|   | Actin, cytoplasmic 1                                  | O18840     | <i>ACTB</i>      | 2.4  | 41.7   | 1  | 1  | 146 |
|   | Fructose-bisphosphate aldolase                        | J9P7A6     | <i>ALDOA</i>     | 5.7  | 38.2   | 1  | 1  | 139 |
|   | Interleukin 4 induced 1                               | A0A5F4DIG1 | <i>IL4I1</i>     | 8.1  | 63.7   | 3  | 3  | 125 |
|   | C1q and TNF related 5                                 | J9NSY4     | <i>C1QTNF5</i>   | 16.7 | 12.2   | 1  | 1  | 121 |
|   | ANK_REP_REGION domain-containing protein              | H9GWX7     | <i>LOC608294</i> | 4.9  | 37.1   | 1  | 2  | 119 |
|   | T-cell surface glycoprotein CD8 alpha chain           | P33706     | <i>CD8A</i>      | 5.0  | 26.0   | 1  | 2  | 110 |
|   | Tumor susceptibility 101                              | A0A5F4DKE2 | <i>TSG101</i>    | 9.8  | 40.1   | 1  | 1  | 94  |
|   | Atlastin GTPase 1                                     | A0A5F4CRL0 | <i>ATL1</i>      | 5.8  | 63.1   | 1  | 1  | 92  |
|   | Ribonuclease                                          | E2RQK5     | <i>RNASEH2A</i>  | 5.2  | 53.5   | 1  | 2  | 92  |
|   | Stathmin domain containing 1                          | A0A5F4DC42 | <i>STMND1</i>    | 5.5  | 40.4   | 1  | 1  | 92  |
|   | Tubulin alpha chain                                   | F1PE21     | <i>LOC477570</i> | 3.1  | 50.0   | 1  | 1  | 89  |
|   | Ig-like domain-containing protein                     | E2RHT2     | <i>CD8B</i>      | 1.9  | 23.6   | 1  | 2  | 88  |
|   | NPC intracellular cholesterol transporter 2           | Q28895     | <i>NPC2</i>      | 15.4 | 16.1   | 1  | 1  | 79  |
|   | Phosphate transporter                                 | A0A5F4DI30 | <i>SLC20A2</i>   | 6.4  | 66.0   | 1  | 1  | 75  |
|   | Titin                                                 | A0A5F4BU36 | <i>TTN</i>       | 0.1  | 3011.0 | 5  | 10 | 74  |
|   | Neutral ceramidase                                    | A0A5F4D9P9 | <i>ASAH2</i>     | 3.5  | 84.6   | 1  | 1  | 72  |
| 6 | Lactotransferrin                                      | F1PR54     | <i>LTF</i>       | 20.5 | 77.3   | 13 | 56 | 516 |
|   | NPC intracellular cholesterol transporter 2           | Q28895     | <i>NPC2</i>      | 15.4 | 16.1   | 1  | 10 | 496 |

|                                                                         |            |                     |      |       |   |    |     |
|-------------------------------------------------------------------------|------------|---------------------|------|-------|---|----|-----|
| Lipocln_cytosolic_FA-bd_dom domain-containing protein                   | E2R6E0     | <i>LCNL1</i>        | 3.7  | 32.6  | 1 | 10 | 380 |
| Prostaglandin-H2 D-isomerase                                            | Q9XS65     | <i>PTGDS</i>        | 17.8 | 21.1  | 3 | 8  | 340 |
| Albumin                                                                 | P49822     | <i>ALB</i>          | 7.6  | 68.6  | 3 | 10 | 320 |
| Ig-like domain-containing protein                                       | J9NSQ1     | <i>N/A</i>          | 15.8 | 12.9  | 1 | 3  | 282 |
| Beta-N-acetylhexosaminidase                                             | F1Q1M8     | <i>HEXB</i>         | 6.7  | 38.1  | 1 | 2  | 247 |
| Sulfhydryl oxidase                                                      | F1PLT8     | <i>QSOX1</i>        | 2.6  | 63.1  | 1 | 1  | 235 |
| Olfactomedin 4                                                          | F1PB68     | <i>OLFM4</i>        | 4.2  | 54.4  | 2 | 5  | 230 |
| A-kinase anchoring protein 13                                           | F1Q074     | <i>AKAP13</i>       | 0.3  | 301.7 | 1 | 6  | 229 |
| Alkaline phosphatase                                                    | A0A5F4DGF5 | <i>ALPL</i>         | 1.8  | 62.9  | 1 | 1  | 224 |
| NTR domain-containing protein                                           | J9NZH4     | <i>LOC102154527</i> | 8.6  | 25.3  | 1 | 1  | 184 |
| GLI family zinc finger 1                                                | A0A5F4D967 | <i>GLI1</i>         | 0.7  | 121.0 | 1 | 22 | 182 |
| Olfactory receptor                                                      | F1PCR4     | <i>OR2AE1</i>       | 3.8  | 36.1  | 1 | 3  | 172 |
| Cysteine rich secretory protein 2                                       | A0A5F4CCD0 | <i>CRISP2</i>       | 13.5 | 35.4  | 2 | 5  | 158 |
| von Willebrand factor A domain containing 3A                            | F1PFJ3     | <i>VWA3A</i>        | 1.2  | 134.3 | 1 | 1  | 154 |
| Boule homolog, RNA binding protein                                      | A0A5F4C9S3 | <i>BOLL</i>         | 1.9  | 39.7  | 1 | 7  | 151 |
| Membrane associated guanylate kinase, WW and PDZ domain containing 2    | J9NWS2     | <i>MAGI2</i>        | 0.6  | 129.2 | 1 | 7  | 151 |
| Leucine rich repeat containing 58                                       | E2R023     | <i>LRRC58</i>       | 1.4  | 61.0  | 1 | 1  | 139 |
| Acyltransferase                                                         | F1PRI9     | <i>DGAT2</i>        | 1.9  | 47.8  | 1 | 15 | 113 |
| Myotubularin related protein 11                                         | E2R1T1     | <i>MTMR11</i>       | 2.1  | 78.3  | 1 | 1  | 110 |
| Rhomboid-related protein 2                                              | E2QY16     | <i>RHBDL2</i>       | 5.6  | 34.3  | 1 | 1  | 102 |
| Epididymal secretory glutathione peroxidase                             | O46607     | <i>GPX5</i>         | 6.8  | 25.3  | 1 | 1  | 101 |
| Claudin domain containing 1                                             | F1PYH4     | <i>CLDND1</i>       | 6.3  | 39.0  | 1 | 1  | 100 |
| Phosphatidylinositol-4,5-bisphosphate 4-phosphatase                     | F1PQN6     | <i>OSGEP</i>        | 6.2  | 36.5  | 1 | 1  | 98  |
| Protein kinase domain-containing protein                                | A0A5F4D0I1 | <i>CSNK2A1</i>      | 5.9  | 40.7  | 1 | 2  | 93  |
| Taste receptor type 2                                                   | A0A5F4BRQ1 | <i>TAS2R4</i>       | 2.8  | 33.0  | 1 | 4  | 91  |
| FA complementation group M                                              | J9NY43     | <i>FANCM</i>        | 0.9  | 229.4 | 1 | 1  | 87  |
| Hyperpolarization activated cyclic nucleotide gated potassium channel 4 | J9PAZ6     | <i>HCN4</i>         | 4.9  | 61.2  | 1 | 1  | 86  |

|   |   |                                                                      |            |                 |      |       |    |     |     |
|---|---|----------------------------------------------------------------------|------------|-----------------|------|-------|----|-----|-----|
|   |   | U2 snRNP associated SURP domain containing                           | E2R1V3     | <i>U2SURP</i>   | 1.4  | 118.3 | 1  | 2   | 80  |
|   |   | Ectonucleoside triphosphate diphosphohydrolase 7                     | F1PKY7     | <i>ENTPD7</i>   | 3.0  | 69.0  | 1  | 1   | 78  |
|   |   | Semaphorin 6B                                                        | F1PX52     | <i>SEMA6B</i>   | 2.7  | 80.9  | 1  | 1   | 78  |
|   |   | Adenylate cyclase type 1                                             | J9NY35     | <i>ADCY1</i>    | 2.3  | 126.1 | 1  | 2   | 76  |
|   |   | Olfactory receptor                                                   | A0A5F4DHC7 | <i>OR13D1B</i>  | 12.7 | 35.5  | 1  | 1   | 72  |
|   |   | Dispatched RND transporter family member 3                           | A0A5F4CKV9 | <i>DISP3</i>    | 1.8  | 144.3 | 1  | 3   | 70  |
| 7 | i | Epididymal secretory protein E1                                      | F1PAR9     | <i>NPC2</i>     | 25.4 | 20.2  | 3  | 29  | 591 |
|   |   | Albumin                                                              | P49822     | <i>ALB</i>      | 14.5 | 68.6  | 8  | 35  | 550 |
|   |   | Lactotransferrin                                                     | F1PR54     | <i>LTF</i>      | 21.5 | 77.3  | 14 | 56  | 543 |
|   |   | NPC intracellular cholesterol transporter 2                          | Q28895     | <i>NPC2</i>     | 21.5 | 16.1  | 2  | 9   | 541 |
|   |   | Lipocln_cytosolic_FA-bd_dom domain-containing protein                | E2R6E0     | <i>LCNL1</i>    | 3.7  | 32.6  | 1  | 8   | 424 |
|   |   | Sulfhydryl oxidase                                                   | F1PLT8     | <i>QSOX1</i>    | 2.6  | 63.1  | 1  | 3   | 364 |
|   | i | Beta-N-acetylhexosaminidase                                          | F1Q1M8     | <i>HEXB</i>     | 6.7  | 38.1  | 1  | 4   | 276 |
|   |   | Epididymal secretory glutathione peroxidase                          | O46607     | <i>GPX5</i>     | 6.8  | 25.3  | 1  | 5   | 264 |
|   |   | Olfactomedin 4                                                       | F1PB68     | <i>OLFM4</i>    | 4.2  | 54.4  | 1  | 2   | 240 |
|   |   | Cysteine rich secretory protein 2                                    | A0A5F4CCD0 | <i>CRISP2</i>   | 4.8  | 35.4  | 1  | 4   | 220 |
|   |   | Olfactory receptor                                                   | F1PCR4     | <i>OR2AE1</i>   | 3.8  | 36.1  | 1  | 1   | 202 |
|   |   | Carboxylesterase 5A                                                  | Q6AW47     | <i>CES5A</i>    | 3.5  | 63.6  | 2  | 109 | 194 |
|   |   | Senataxin                                                            | A0A5F4CUE8 | <i>SETX</i>     | 0.3  | 300.1 | 1  | 1   | 187 |
|   |   | von Willebrand factor A domain containing 3A                         | F1PFJ3     | <i>VWA3A</i>    | 1.2  | 134.3 | 1  | 2   | 182 |
|   |   | Boule homolog, RNA binding protein                                   | A0A5F4C9S3 | <i>BOLL</i>     | 1.9  | 39.7  | 1  | 3   | 172 |
|   |   | Membrane associated guanylate kinase, WW and PDZ domain containing 2 | J9NWS2     | <i>MAGI2</i>    | 0.6  | 129.2 | 1  | 2   | 172 |
|   |   | A-kinase anchoring protein 13                                        | F1Q074     | <i>AKAP13</i>   | 0.3  | 301.7 | 1  | 5   | 169 |
|   |   | Olfactory receptor                                                   | J9P4T0     | <i>OR5AC26</i>  | 6.4  | 37.3  | 1  | 3   | 137 |
|   |   | Rho GTPase activating protein 24                                     | A0A5F4BYE4 | <i>ARHGAP24</i> | 1.9  | 76.2  | 1  | 1   | 131 |
|   |   | Adhesion G protein-coupled receptor A2                               | J9NRV9     | <i>ADGRA2</i>   | 2.0  | 140.9 | 1  | 1   | 131 |

|   |   |                                                            |            |                |      |       |   |    |     |
|---|---|------------------------------------------------------------|------------|----------------|------|-------|---|----|-----|
|   |   | U2 snRNP associated SURP domain containing                 | E2R1V3     | <i>U2SURP</i>  | 1.4  | 118.3 | 1 | 1  | 125 |
|   |   | Interleukin-1 receptor-associated kinase 4                 | E2RDL0     | <i>IRAK4</i>   | 2.8  | 51.4  | 1 | 1  | 115 |
|   |   | Glutamine--fructose-6-phosphate transaminase (isomerizing) | J9P432     | <i>GFPT1</i>   | 1.2  | 76.1  | 1 | 3  | 103 |
|   |   | RUN domain containing 1                                    | F1PAD7     | <i>RUNDC1</i>  | 1.3  | 67.6  | 1 | 1  | 97  |
|   |   | Codanin 1                                                  | F1PXQ3     | <i>CDAN1</i>   | 1.9  | 131.3 | 1 | 4  | 95  |
|   |   | Solute carrier family 14 member 1                          | A0A5F4CTT5 | <i>SLC14A1</i> | 2.5  | 53.7  | 1 | 1  | 95  |
|   |   | TraB domain containing 2A                                  | J9NY87     | <i>TRABD2A</i> | 3.0  | 57.8  | 1 | 1  | 92  |
|   |   | Phospholipase A2 receptor 1                                | A0A5F4D8I6 | <i>PLA2R1</i>  | 0.5  | 160.5 | 1 | 1  | 91  |
|   |   | Galectin                                                   | A0A5F4C4R0 | <i>LGALS9</i>  | 3.5  | 41.4  | 1 | 1  | 91  |
|   |   | Calcium dependent secretion activator 2                    | A0A5F4D577 | <i>CADPS2</i>  | 1.1  | 147.2 | 1 | 1  | 90  |
|   |   | Dispatched RND transporter family member 3                 | A0A5F4CKV9 | <i>DISP3</i>   | 1.8  | 144.3 | 1 | 2  | 89  |
|   |   | Ig-like domain-containing protein                          | A0A5F4CQU2 | <i>DLA-DMB</i> | 4.1  | 27.4  | 1 | 4  | 88  |
|   |   | Ectonucleoside triphosphate diphosphohydrolase 1           | A0A5F4CCH2 | <i>ENTPD1</i>  | 3.7  | 55.1  | 1 | 2  | 86  |
|   |   | zf-3CxxC domain-containing protein                         | J9NXR0     | <i>RTP5</i>    | 1.4  | 60.5  | 1 | 1  | 80  |
|   |   | Desmoglein-1                                               | Q9GKQ8     | <i>DSG1</i>    | 4.0  | 113.9 | 1 | 2  | 80  |
|   |   | Myosin IE                                                  | A0A5F4CHW1 | <i>MYO1E</i>   | 1.3  | 121.9 | 1 | 1  | 80  |
|   |   | Nik related kinase                                         | F1PB88     | <i>NRK</i>     | 0.5  | 171.5 | 1 | 2  | 79  |
|   |   | Caspase recruitment domain family member 6                 | F1PIZ1     | <i>CARD6</i>   | 0.7  | 122.2 | 1 | 1  | 79  |
|   |   | Cation-transporting ATPase                                 | F1PRT7     | <i>ATP13A4</i> | 0.7  | 134.0 | 1 | 3  | 76  |
|   |   | Transporter 1, ATP binding cassette subfamily B member     | F1PTP4     | <i>TAP1</i>    | 3.4  | 75.4  | 1 | 1  | 75  |
|   |   | Calcium-transporting ATPase                                | J9P2B9     | <i>ATP2A3</i>  | 2.7  | 109.6 | 1 | 1  | 74  |
|   |   | Signal recognition particle subunit SRP72                  | P33731     | <i>SRP72</i>   | 3.7  | 74.5  | 1 | 1  | 73  |
|   |   | Histone H2A                                                | F1P790     | <i>H2AW</i>    | 21.5 | 14.2  | 1 | 1  | 72  |
| 8 | j | Epididymal secretory protein E1                            | F1PAR9     | <i>NPC2</i>    | 32.3 | 20.2  | 3 | 21 | 540 |
|   |   | Lactotransferrin                                           | A0A5F4BVF3 | <i>LTF</i>     | 12.6 | 68.8  | 6 | 22 | 497 |
|   |   | Cysteine rich secretory protein 2                          | A0A5F4D6X1 | <i>CRISP2</i>  | 8.4  | 36.1  | 1 | 4  | 330 |
|   |   | A-kinase anchoring protein 13                              | F1Q074     | <i>AKAP13</i>  | 0.3  | 301.7 | 1 | 5  | 237 |



|   |                                                   |            |                     |      |       |   |   |     |
|---|---------------------------------------------------|------------|---------------------|------|-------|---|---|-----|
| j | Acrosin-binding protein                           | E2RNS8     | <i>ACRBP</i>        | 1.9  | 61.3  | 1 | 3 | 231 |
|   | NTR domain-containing protein                     | J9NZH4     | <i>LOC102154527</i> | 8.6  | 25.3  | 1 | 1 | 165 |
|   | Olfactory receptor family 56 subfamily B member 1 | F6XR78     | <i>OR56B1</i>       | 3.1  | 35.8  | 1 | 1 | 104 |
|   | Fibrocystin                                       | E2RK30     | <i>PKHD1</i>        | 2.3  | 447.6 | 6 | 6 | 103 |
|   | Adhesion G protein-coupled receptor A2            | J9NRV9     | <i>ADGRA2</i>       | 2.0  | 140.9 | 2 | 3 | 101 |
|   | CD109 molecule                                    | A0A5F4CP99 | <i>CD109</i>        | 1.8  | 169.3 | 1 | 3 | 100 |
|   | Dual oxidase maturation factor 1                  | A0A5F4BRG3 | <i>DUOXA1</i>       | 19.9 | 32.8  | 1 | 1 | 93  |
|   | Solute carrier family 16 member 6                 | F1Q090     | <i>SLC16A6</i>      | 5.5  | 57.1  | 1 | 1 | 91  |
|   | Interferon alpha inducible protein 6              | E2RSX9     | <i>IFI6</i>         | 55.4 | 13.3  | 1 | 1 | 90  |
|   | WAP domain-containing protein                     | E2RCT1     | <i>N/A (WAPdcp)</i> | 14.7 | 13.0  | 1 | 2 | 85  |
|   | Myosin heavy chain 7                              | E2RJD1     | <i>MYH7</i>         | 1.6  | 203.4 | 1 | 2 | 84  |
|   | Protein inhibitor of activated STAT 3             | F1Q1E9     | <i>PIAS3</i>        | 6.8  | 64.6  | 2 | 2 | 82  |
|   | DOP1 leucine zipper like protein B                | E2RIH1     | <i>DOP1B</i>        | 1.2  | 253.6 | 1 | 1 | 77  |
|   | Tuftelin-interacting protein 11                   | A1XD97     | <i>TFIP11</i>       | 3.2  | 96.6  | 1 | 1 | 71  |

---
